# Supplementary material for: Aberrantly expressed miR-582-3p maintains lung cancer stem cell-like traits by activating Wnt/β-catenin signalling
Source: PubMed Central journal article supplement (PMC4667703; doi:10.1038/ncomms9640), 2015-10-15
Supplement: ncomms9640-s1.pdf [file ncomms9640-s1.pdf]

## Supplementary Information

### Supplementary Figure 1

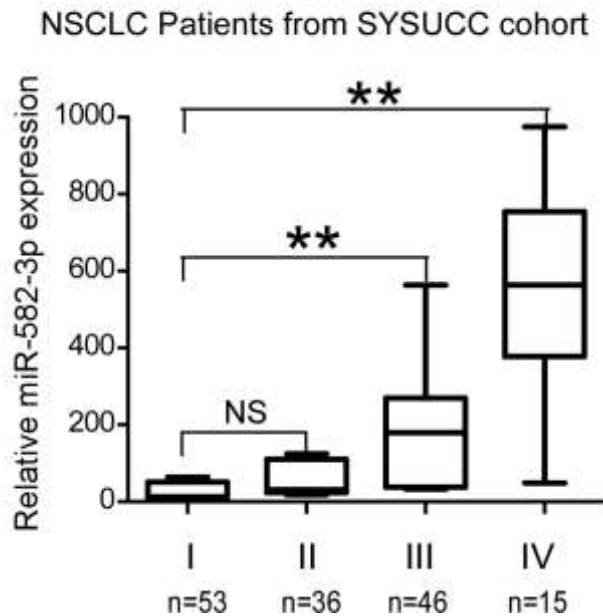

**Supplementary Figure 1. Expression of miR-582-3p in NSCLC tumor tissues correlates with clinical staging.** Expression levels of miR-582-3p in the indicated NSCLC patients at each clinical stage (I-IV) as determined by RT-qPCR. Transcript quantities were normalized to U6 expression. For the Box-Whisker diagrams, the lower and upper bounds of the boxes represent the lower and upper quartiles, respectively; lines within the boxes represent the median values; and whiskers denote the minimum and maximum values in the indicated data sets. Each bar represents the mean $\pm$ s.e.m. derived from three independent experiments. A two-tailed Student's *t*-test was used for statistical analysis (\*\*:  $P < 0.01$ , NS: not statistically significant).

## Supplementary Figure 2

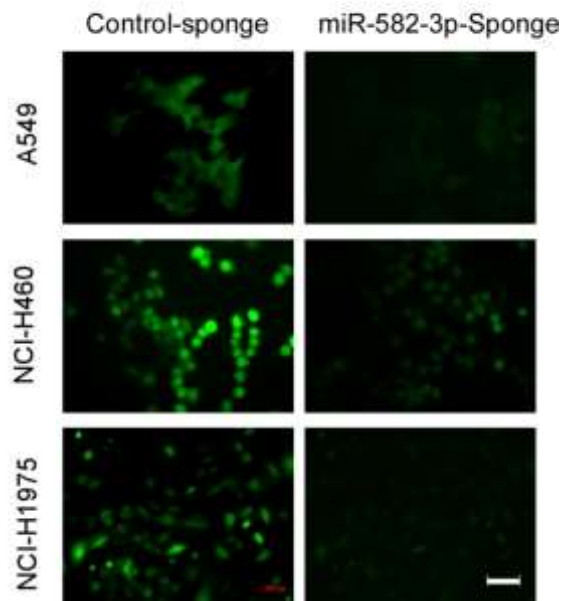

**Supplementary Figure 2. The effect of miR-582-3p silencing by miR-582-sponge.**

Fluorescent visualization of A549, NCI-H460 and NCI-H1975 cells transduced with GFP-control-sponge or pSin-GFP-miR-582-sponge plasmid confirms efficient inhibition of miR-582-3p. Scale bar: 100  $\mu$ m.

**Supplementary Figure 3**

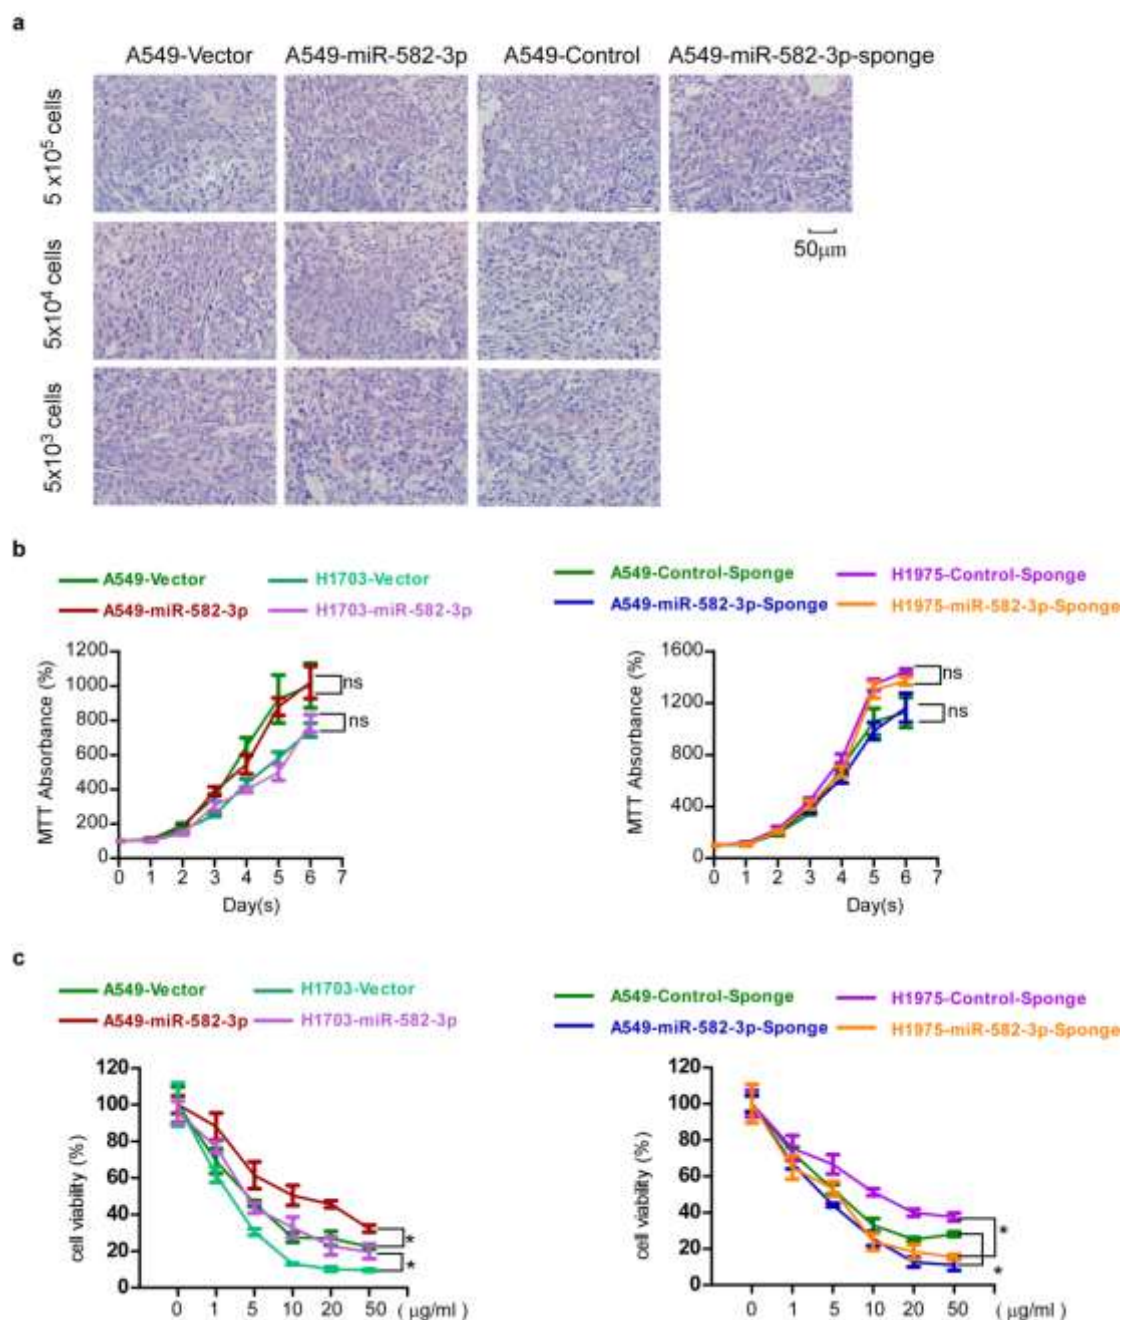

**Supplementary Figure 3. miR-582-3p promotes resistance of NSCLC cells to CDDP treatment.** (a) Histological confirmation of xenografted NSCLC tumors by hematoxylin/eosin (H&E) staining in the indicated groups. Scale bar: 50 µm. (b) Growth curves of the indicated cells as determined by MTT assay. (c) MTT assays revealed the number of viable cells of each indicated cell line treated with the indicated concentration of CDDP. Each bar represents the mean±s.e.m. derived from three independent experiments. A two-tailed Student's *t*-test was used for statistical analysis (\*:  $P < 0.05$ , ns: not statistically significant).

**Supplementary Figure 4**

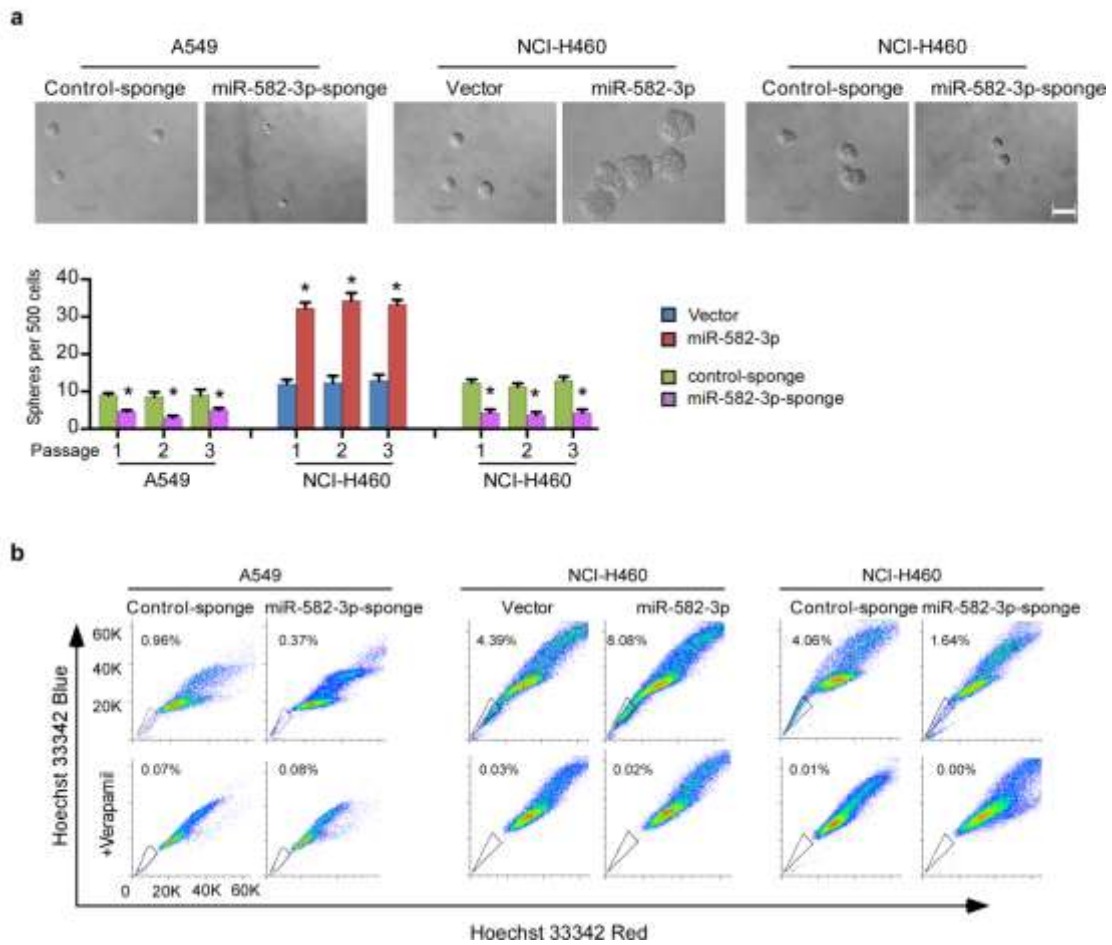

**Supplementary Figure 4. miR-582-3p promotes stem cell-like properties in NSCLC cells *in vitro*.** (a) Representative images and quantification of cellular spheres formed by the indicated cells. Each bar represents the mean $\pm$ s.e.m. derived from three independent experiments. A two-tailed Student's *t*-test was used for statistical analysis (\*:  $P < 0.05$ ). Scale bar: 100  $\mu$ m. (b) Hoechst 33342 dye exclusion assay showing the proportions of SP+ cells in the indicated cells.

### Supplementary Figure 5

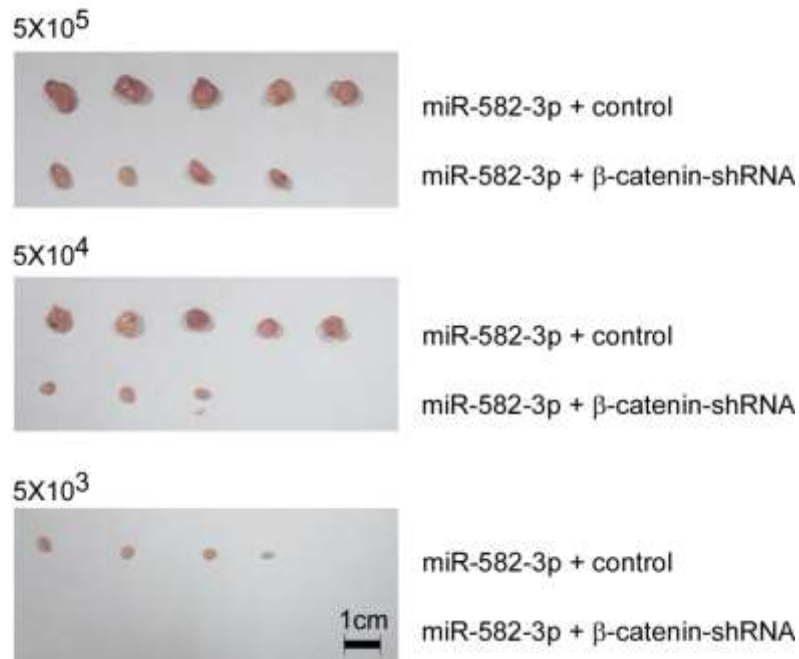

**Supplementary Figure 5. Silencing  $\beta$ -catenin suppresses the tumorigenesis of miR-582-3p-overexpressing NSCLC cells.** Excised xenografts derived from the indicated cells at various cell densities are shown. Scale bar: 1 cm.

**Supplementary Figure 6**

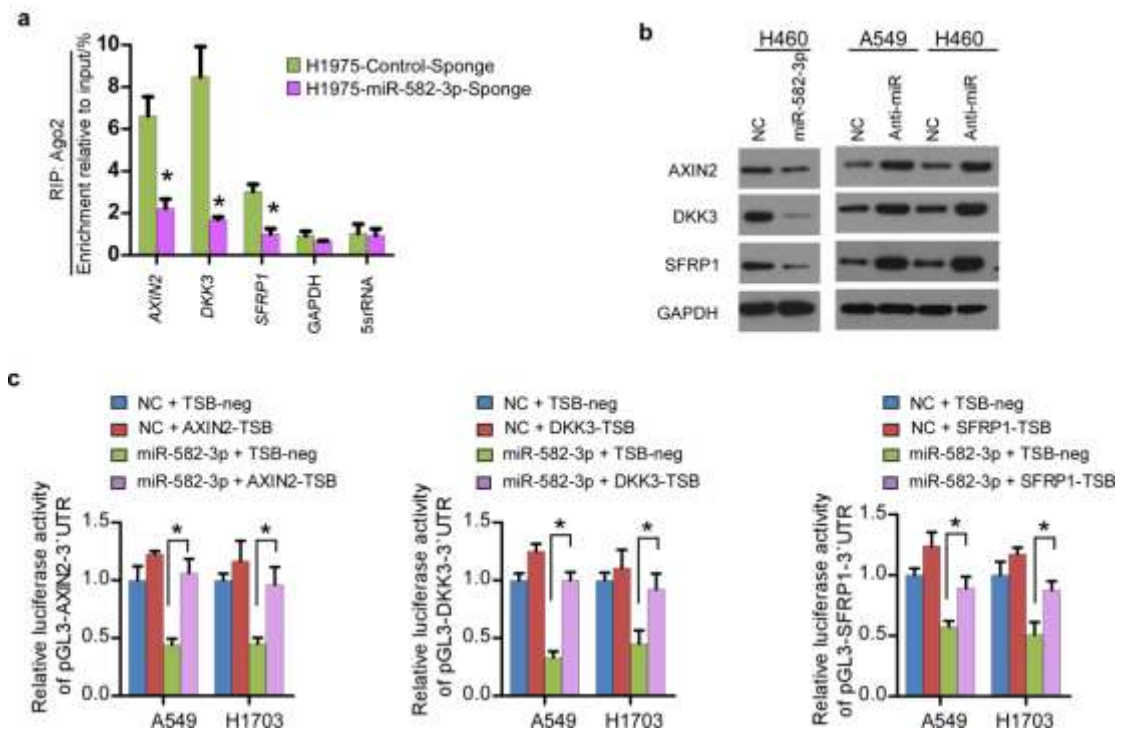

**Supplementary Figure 6. miR-582-3p directly targets AXIN2, DKK3 and SFRP1.** (a) Enrichment of the 3'UTRs of AXIN2, DKK3 and SFRP1 in Ago2-containing miRNP complexes detected by RT-qPCR following immunoprecipitation using an antibody against Ago2. The results are presented as normalized fold enrichment. (b) Western blot analysis of AXIN2, DKK3 and SFRP1 expression in the indicated cells. (c) Luciferase assay of the 3' UTR activity of AXIN2, DKK3 and SFRP1 in the indicated cells transfected with the indicated TSB. Each bar represents the mean±s.e.m. derived from three independent experiments. A two-tailed Student's *t*-test was used for statistical analysis (\*:  $P < 0.05$ ).

## Supplementary Figure 7

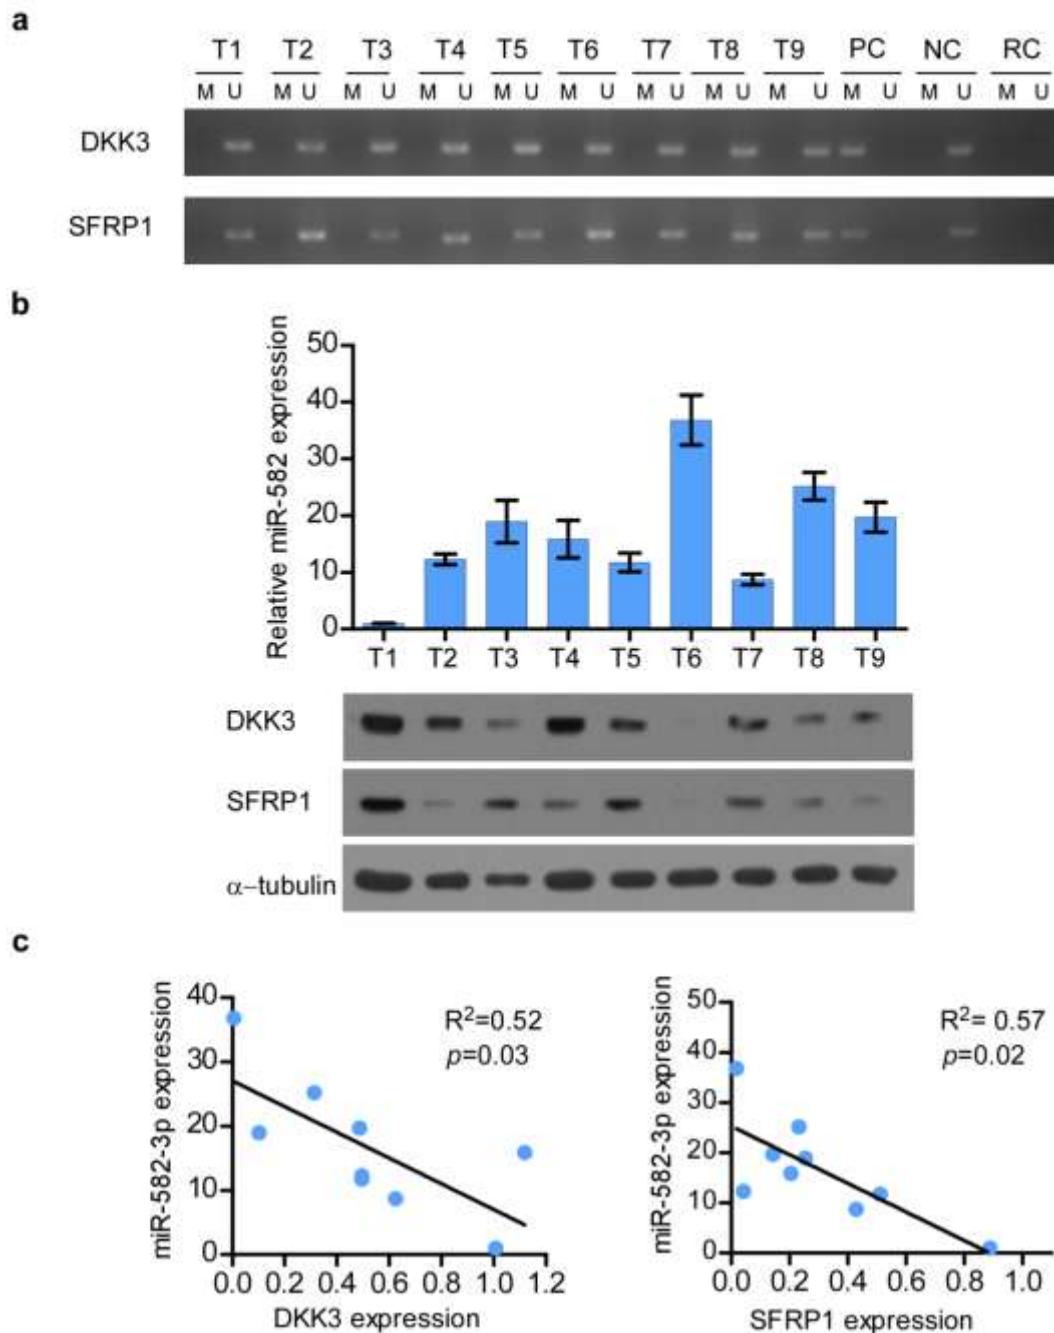

**Supplementary Figure 7. miR-582-3p expression negatively correlates with DKK3 and SFRP1 expression in NSCLC specimens in which both DKK3 and SFRP1 promoters are unmethylated.** (a) Nine specimens with unmethylated DKK3 and SFRP1 promoters were detected by MSP. (b) RT-qPCR analysis of miR-582-3p expression and western blot analysis of DKK3 and SFRP1 expression in the 9 specimens. (c) Correlation analysis of miR-582-3p expression with DKK3 and SFRP1 levels in the 9 specimens.

Figure 2e

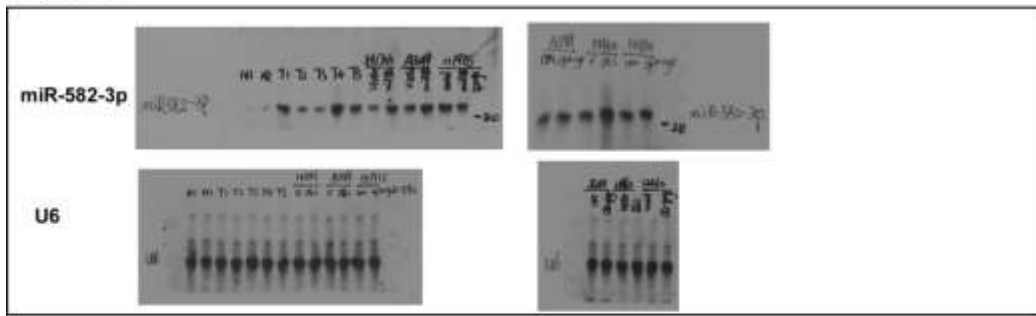

Figure 5d

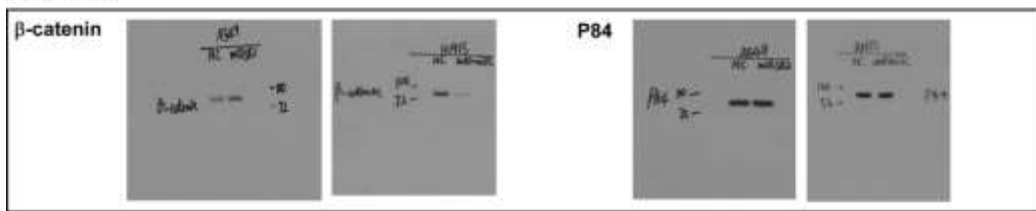

Figure 6c and Supplementary Figure 6b

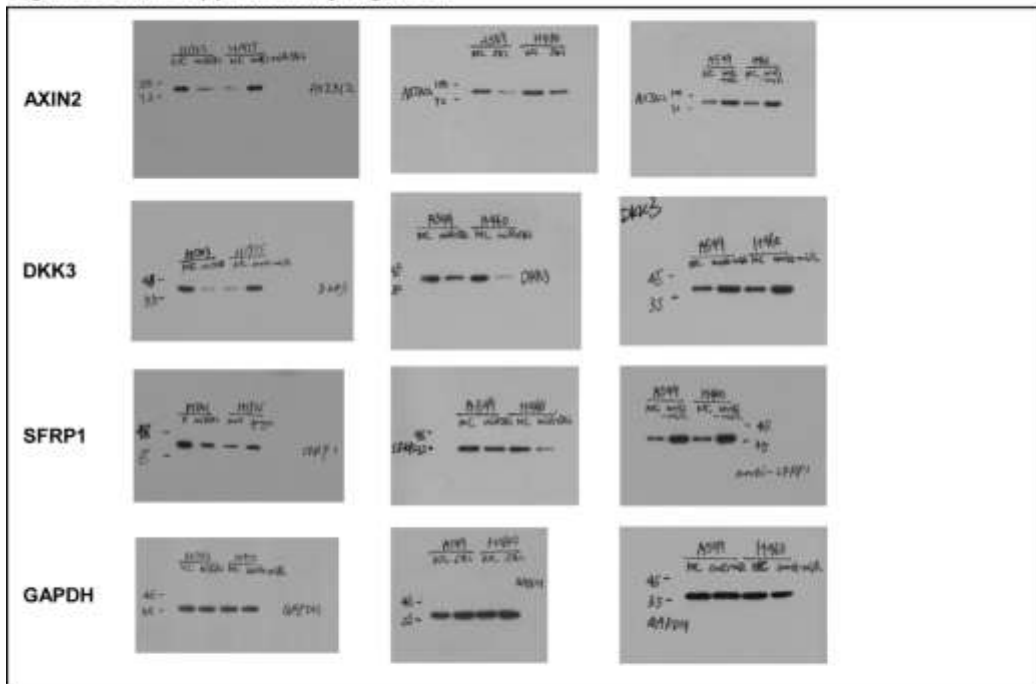

Supplementary Figure 7b

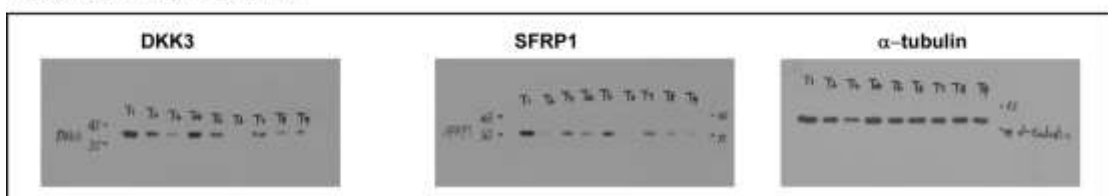

Supplementary Figure 8. Uncropped scans of all western blots presented in Figures and supplementary Figures.



**Supplementary Table 1. Clinicopathological Characteristics of Studied Patients and Expression of miR-582 in NSCLC from TCGA Dataset**

| <b>Terms</b>                   | <b>No. of cases</b> | <b>Percentage</b> | <b>Terms</b>                 | <b>No. of cases</b> | <b>Percentage</b> |
|--------------------------------|---------------------|-------------------|------------------------------|---------------------|-------------------|
| <b>Age (years)</b>             |                     |                   | <b>Clinical Stage</b>        |                     |                   |
| ≥Median                        | 291                 | 54.0%             | Stage I                      | 287                 | 53.2%             |
| <Median                        | 248                 | 46.0%             | Stage II                     | 145                 | 26.9%             |
| <b>Gender</b>                  |                     |                   | Stage III                    | 86                  | 16.0%             |
| Male                           | 312                 | 57.9%             | Stage IV                     | 18                  | 3.30%             |
| Female                         | 227                 | 42.1%             | <b>Tumor Size</b>            |                     |                   |
| <b>Pathologic Type</b>         |                     |                   | T1                           | 163                 | 30.2%             |
| LUAD <sup>(1)</sup>            | 346                 | 64.2%             | T2                           | 302                 | 56.0%             |
| LUSC <sup>(2)</sup>            | 193                 | 35.8%             | T3                           | 55                  | 10.2%             |
| <b>Chemotherapy</b>            |                     |                   | T4                           | 18                  | 3.30%             |
| YES                            | 136                 | 25.2%             | <b>Nodes Pathologic</b>      |                     |                   |
| NO                             | 403                 | 74.8%             | N0                           | 350                 | 64.9%             |
| <b>Tobacco Smoking History</b> |                     |                   | N1                           | 109                 | 20.2%             |
| Reformed Smoker                | 327                 | 60.7%             | N2                           | 69                  | 12.8%             |
| Current Smoker                 | 139                 | 25.8%             | N3                           | 1                   | 0.20%             |
| Non-smoker                     | 55                  | 10.2%             | <b>Metastasis Pathologic</b> |                     |                   |
| <b>miR-582 expression</b>      |                     |                   | M0                           | 364                 | 67.5%             |
| miR-582 High                   | 270                 | 50.1%             | M1                           | 17                  | 3.20%             |
| miR-582 Low                    | 269                 | 49.9%             |                              |                     |                   |

LUAD<sup>(1)</sup>: lung adenocarcinoma

LUSC<sup>(2)</sup>:lung squamous cell carcinoma

**Supplementary Table 2. Clinicopathological Characteristics of Studied Patients and Expression of miR-582 in NSCLC from the SYSUCC Cohort**

| <b>Terms</b>              | <b>No. of cases</b> | <b>Percentage</b> | <b>Terms</b>              | <b>No. of cases</b> | <b>Percentage</b> |
|---------------------------|---------------------|-------------------|---------------------------|---------------------|-------------------|
| <b>Age(y)</b>             |                     |                   | <b>T Classification</b>   |                     |                   |
| ≥Median                   | 75                  | 50.0%             | T1                        | 19                  | 12.7%             |
| <Median                   | 75                  | 50.0%             | T2                        | 79                  | 52.7%             |
| <b>Gender</b>             |                     |                   | T3                        | 44                  | 29.3%             |
| male                      | 117                 | 78.0%             | T4                        | 8                   | 5.33%             |
| female                    | 33                  | 22.0%             | <b>N Classification</b>   |                     |                   |
| <b>Pathologic Type</b>    |                     |                   | N0                        | 81                  | 54.0%             |
| LUSC                      | 62                  | 41.3%             | N1                        | 34                  | 22.7%             |
| LUAD                      | 73                  | 48.7%             | N2                        | 34                  | 22.7%             |
| Adenosquamous Carcinoma   | 15                  | 10.0%             | N3                        | 1                   | 0.67%             |
| <b>Clinical Staging</b>   |                     |                   | <b>Distant Metastasis</b> |                     |                   |
| Stage I                   | 53                  | 35.3%             | YES                       | 15                  | 10.0%             |
| Stage II                  | 36                  | 24.0%             | NO                        | 135                 | 90.0%             |
| Stage III                 | 46                  | 30.7%             | <b>Therapy</b>            |                     |                   |
| Stage IV                  | 15                  | 10.0%             | NO                        | 104                 | 69.3%             |
| <b>miR-582 expression</b> |                     |                   | YES                       | 46                  | 30.7%             |
| miR-582 High              | 75                  | 50.0%             |                           |                     |                   |
| miR-582 Low               | 75                  | 50.0%             |                           |                     |                   |

**Supplementary Table 3. Univariate and Multivariate Analysis of Various Clinical Parameters in Patients with NSCLC by Cox-Regression Analysis from TCGA Dataset**

|                                | Univariate analysis |         | Multivariate analysis |         |
|--------------------------------|---------------------|---------|-----------------------|---------|
|                                | HR(95%CI)           | P value | HR(95%CI)             | P value |
| <b>Age(y)</b>                  |                     |         |                       |         |
| < Median                       | 1.00                |         | 1.00                  |         |
| ≥ Median                       | 1.14 (0.79-1.65)    | 0.476   | 1.37(0.91-2.04)       | 0.128   |
| <b>Gender</b>                  |                     |         |                       |         |
| male                           | 1.00                |         | 1.00                  |         |
| female                         | 0.91(0.63-1.30)     | 0.604   | 0.96 (0.64-1.44)      | 0.851   |
| <b>Pathologic Type</b>         |                     |         |                       |         |
| LUAD <sup>(1)</sup>            | 1.00                |         | 1.00                  |         |
| LUSC <sup>(2)</sup>            | 0.79 (0.54-1.15)    | 0.224   | 0.71 (0.47-1.09)      | 0.315   |
| <b>T Classification</b>        |                     |         |                       |         |
| T1                             | 1.00                |         | 1.00                  |         |
| T2                             | 1.63(1.02-2.60)     | 0.042   | 1.53(0.93-2.50)       | 0.092   |
| T3                             | 1.31(0.56-3.06)     | 0.539   | 1.35(0.56-3.22)       | 0.504   |
| T4                             | 2.54(1.13-5.70)     | 0.024   | 1.53(0.61-3.81)       | 0.362   |
| <b>N Classification</b>        |                     |         |                       |         |
| N0                             | 1.00                |         | 1.00                  |         |
| N1                             | 1.24(0.79-1.93)     | 0.352   | 1.21 (0.76-1.93)      | 0.413   |
| N2、 N3                         | 2.24 (1.44-3.48)    | 0.001   | 2.37(1.46-3.86)       | 0.001   |
| <b>Distant Metastasis</b>      |                     |         |                       |         |
| No                             | 1.00                |         | 1.00                  |         |
| Yes                            | 1.81(0.88-3.74)     | 0.106   | 1.87(0.83-4.25)       | 0.133   |
| <b>Tobacco Smoking History</b> |                     |         |                       |         |
| Non-smoker                     | 1.00                |         | 1.00                  |         |
| Reformed Smoker                | 1.01(0.49-2.08)     | 0.986   | 1.40 (0.63-3.10)      | 0.407   |
| Current Smoker                 | 0.92(0.41-2.05)     | 0.838   | 1.44(0.59-3.49)       | 0.424   |
| <b>Chemotherapy</b>            |                     |         |                       |         |
| NO                             | 1.00                |         | 1.00                  |         |
| YES                            | 1.21(0.80-1.81)     | 0.366   | 1.02(0.65-1.59)       | 0.948   |
| <b>miR-582 Expression</b>      |                     |         |                       |         |
| Low                            | 1.00                |         | 1.00                  |         |
| High                           | 1.70(1.17-2.45)     | 0.005   | 1.85(1.25-2.73)       | 0.002   |

LUAD<sup>(1)</sup>: lung adenocarcinoma

LUSC<sup>(2)</sup>:lung squamous cell carcinoma

**Supplementary Table 4. Univariate and Multivariate Analysis of Various Clinical Parameters in Patients with NSCLC by Cox-Regression Analysis from SYSUCC Cohort**

|                           | Univariate analysis |         | Multivariate analysis |         |
|---------------------------|---------------------|---------|-----------------------|---------|
|                           | HR(95%CI)           | P value | HR(95%CI)             | P value |
| <b>Age(y)</b>             |                     |         |                       |         |
| < Median                  | 1.00                |         | 1.00                  |         |
| ≥ Median                  | 1.47(0.96-2.24)     | 0.073   | 1.50(0.97-2.33)       | 0.069   |
| <b>Gender</b>             |                     |         |                       |         |
| male                      | 1.00                |         | 1.00                  |         |
| female                    | 0.65(0.38-1.11)     | 0.114   | 0.67(0.37-1.19)       | 0.173   |
| <b>Pathologic Type</b>    |                     |         |                       |         |
| LUAD                      | 1.00                |         | 1.00                  |         |
| LUSC                      | 0.90(0.57-1.41)     | 0.642   | 0.97(0.59-1.61)       | 0.919   |
| Adenosquamous carcinoma   | 1.80(0.93-3.50)     | 0.082   | 2.23(1.08-4.60)       | 0.030   |
| <b>T Classification</b>   |                     |         |                       |         |
| T1                        | 1.00                |         | 1.00                  |         |
| T2                        | 3.11(1.23-7.85)     | 0.016   | 2.57(0.99-6.70)       | 0.053   |
| T3                        | 4.57(1.78-11.73)    | 0.002   | 3.28(1.20-8.95)       | 0.021   |
| T4                        | 4.16(1.20-14.41)    | 0.024   | 2.20(0.55-8.81)       | 0.264   |
| <b>N Classification</b>   |                     |         |                       |         |
| N0                        | 1.00                |         | 1.00                  |         |
| N1                        | 1.74(1.03-2.95)     | 0.040   | 1.61(0.88-2.93)       | 0.122   |
| N2 N3                     | 2.98(1.81-4.88)     | <0.001  | 1.96(1.12-3.43)       | 0.018   |
| <b>Distant Metastasis</b> |                     |         |                       |         |
| No                        | 1.00                |         | 1.00                  |         |
| Yes                       | 2.07(1.13-3.82)     | 0.019   | 1.63(0.79-3.38)       | 0.187   |
| <b>Chemotherapy</b>       |                     |         |                       |         |
| NO                        | 1.00                |         | 1.00                  |         |
| YES                       | 1.05(0.67-1.65)     | 0.829   | 0.75(0.46-1.21)       | 0.241   |
| <b>miR-582 Expression</b> |                     |         |                       |         |
| Low                       | 1.00                |         | 1.00                  |         |
| High                      | 2.85(1.83-4.44)     | <0.001  | 2.26(1.39-3.68)       | 0.001   |

**Supplementary Table 5. miR-582-3p expression analysis correlation between RT-qPCR and *in situ* hybridization.**

|         |                            | <i>in situ</i> hybridization |                             | Total       |
|---------|----------------------------|------------------------------|-----------------------------|-------------|
|         |                            | miR-582-Low<br>( score<6 )   | miR-582-High<br>( score≥6 ) |             |
| qRT-PCR | miR-582-Low<br>( <median)  | 68                           | 7                           | 75          |
|         | miR-582-High<br>( >median) | 4                            | 71                          | 75          |
| Total   |                            | 72                           | 78                          | 150         |
|         |                            | $\chi^2=106$                 | $r = 0.86$                  | $P < 0.001$ |

**Supplementary Table 6. The sequences of primers used in Real-time RT-PCR assay.**

| Gene Symbol | Real-time-primer-up    | Real-time-primer-down |
|-------------|------------------------|-----------------------|
| DKK3        | CAGGTGTACTGGAAGCTGGC   | TCACATCTGTGGGAGACGAA  |
| AXIN2       | CTGGTGCAAAGACATAGCCA   | AGTGTGAGGTCCACGGAAAC  |
| SFRP1       | GGCTTCTTCTTCTTGGGGAC   | ATCTCTGTGCCAGCGAGTTT  |
| TWIST1      | TCCATTTTCTCCTTCTCTGGAA | CCTTCTCGGTCTGGAGGAT   |
| MYC         | CACCGAGTCGTAGTCGAGGT   | TTTCGGGTAGTGGAAAACCA  |
| MMP7        | GCATCTCCTTGAGTTTGGCT   | GAGCTACAGTGGGAACAGGC  |
| CCND1       | GGCGGATTGGAAATGAACTT   | TCCTCTCCAAAATGCCAGAG  |
| CD44        | CACGTGGAATACACCTGCAA   | GACAAGTTTTGGTGGCACG   |
| BMP4        | GCATTCCGGTTACCAGGAATC  | TGAGCCTTCCAGCAAGTTT   |
| FGF18       | CTTACGGCTCACATCGTCC    | ACTTCCTGCTGCTGTGCTTC  |

**Supplementary Table 7. The sequences of primer pairs detecting the methylated or unmethylated promoters of DKK3 and SFRP1**

---

|                            |                                                                             |
|----------------------------|-----------------------------------------------------------------------------|
| Methylated DKK3 primers    | 5'-GGCGTTAGGGGCGGGCGGC-3'<br>5'-GCTCTGCGCCCGCAACCGCCG-3'                    |
| Unmethylated DKK3 primers  | 5'-GGGTGTTAGGGGTGGGTGGTG-3'<br>5'-CCACTCTACACCCACAACCACCA-3'                |
| Methylated SFRP1 primers   | 5'-TGTAGTTTTTCGGAGTTAGTGTTCGCGC-3'<br>5'-CCTACGATCGAAAACGACGCGAACG-3'       |
| Unmethylated SFRP1 primers | 5'-GTTTTGTAGTTTTTGGAGTTAGTGTGTGT-3'<br>5'-CTCAACCTACAATCAAAAACAACACAAACA-3' |

---
